# Supplementary material for: A boron imidazolate framework with mechanochromic and electrocatalytic properties
Source: Royal Society of Chemistry journal article supplement (doi:10.1039/c8mh00859k), 2018-01-01
Supplement: c8mh00859k1.pdf [file c8mh00859k1.pdf]

*Electronic Supplementary Information (ESI)*

**A boron imidazolate framework with mechanochromic and electrocatalytic properties**

Tian Wen,<sup>a, b</sup> Yao Zheng,<sup>a</sup> Chaochen Xu,<sup>a</sup> Jian Zhang,<sup>b</sup> Mietek Jaroniec,<sup>c</sup> and Shi-Zhang Qiao\*,<sup>a</sup>

[a] T. Wen, Dr. Y. Zheng, C. Xu, Prof. S. Z. Qiao  
School of Chemical Engineering, The University of Adelaide Adelaide, SA 5005, Australia.  
E-mail: s.qiao@adelaide.edu.au

[b] T. Wen, Prof. J. Zhang  
State Key Laboratory of Structural Chemistry, Fujian Institute of Research on the Structure of Matter, Chinese Academy of Sciences, Fuzhou, Fujian 350002, P. R. China.

[c] Prof. M. Jaroniec  
Department of Chemistry and Biochemistry, Kent State University Kent, OH 44240, USA.

**Part I: Experimental Section**

**1. Single-crystal structural determination**

Suitable single crystals of **BIF-89** were carefully selected and glued to a thin glass fiber. Crystallographic data of **BIF-89** were collected on a Mercury single crystal diffractometer equipped with graphite-monochromatic Mo K $\alpha$  radiation ( $\lambda = 0.71073$  Å) at room temperature. The structures were solved by direct methods and refined by full-matrix least-squares on F2. Crystal data as well as details of data collection and refinement for **BIF-89** are summarized in Table S1. All powder X-ray diffraction (PXRD) analyses were performed on a Rigaku Dmax2500 diffractometer with Cu K $\alpha$  radiation ( $\lambda = 1.54056$  Å) using a step size of 0.05°. Thermogravimetric analyses (TGA) were performed on a Mettler Toledo TGA/SDTA 851e analyzer using a heating rate of 10 °C/min under N<sub>2</sub> atmosphere. Elemental analyses (EA) for C, H, and N were done on an EA1110 CHNSO CE elemental analyzer. Fourier transform infrared (FT-IR) spectra were taken on a Nicolet Magna 750 FT-IR spectrometer in the 4000–500 cm<sup>-1</sup> region by using KBr pellets. Steady-state photoluminescence spectra were recorded by using an Edinburgh FLS920 spectrometer equipped with a continuous Xe 900 xenon lamp.

**2. Electrochemical characterization**

OER measurements were performed in a three-electrode glass cell. The data were recorded using a CHI760 D bipotentiostat (CH Instruments, Inc., USA). The synthesized samples grown on a substrate (e.g., Ni foam 1cm x1cm) were directly used as the working electrode for electrochemical

characterizations. The reference electrode was Ag/AgCl in 4 M KCl solution and the counter electrode was a platinum wire. The current density was normalized to the geometrical surface area and the measured potentials vs. Ag/AgCl were converted to a reversible hydrogen electrode (RHE) scale according to the Nernst equation ( $E_{\text{RHE}} = E_{\text{Ag/AgCl}} + 0.059 \times \text{pH} + 0.205$ ). A flow of N<sub>2</sub> was maintained over the electrolyte (1.0 M KOH) during electrochemical measurements in order to ensure the O<sub>2</sub>/H<sub>2</sub>O equilibrium at 1.23 V vs. RHE. The polarization curves were recorded with the scan rate of 5 mVs<sup>-1</sup>. The working electrodes were scanned for several times before the data for polarization curves were collected, corrected for the iR contribution within the cell. Electrochemical impedance spectroscopy (EIS) measurements were tested by applying an AC voltage with 5 mV amplitude in a frequency range from 100000 to 1 Hz and recorded at 1.60 V vs. RHE.

### 3. Synthesis of BIF-89

Benzene - 1, 2, 4, 5-tetracarboxylate (0.0165g), CdSO<sub>4</sub>·4H<sub>2</sub>O (0.0378g), KB(im)<sub>4</sub> (0.0107g), in a N, N-dimethylformamide (DMF; 4mL) / water (H<sub>2</sub>O; 1mL) / ethanol (CH<sub>3</sub>CH<sub>2</sub>OH; 1mL) solution were placed in a 20 mL vial. The sample was heated at 80 °C for 5 days, and then cooled to room temperature. After washing with ethanol and distilled water, the colorless crystals were obtained (31% yield). EA calc. (%) for C<sub>17</sub> H<sub>15</sub> B Cd N<sub>8</sub> O<sub>5</sub>: C, 38.16; H, 2.81; N, 20.95; found: C 38.13, H 2.41, N, 20.97.

### 4. Electrocatalysts synthesis

#### 4.1 Synthesis of BIF-89-NF-1

Firstly, a Ni foam (1.5 cm × 2cm × 0.02 cm) was repeatedly rinsed with absolute ethanol and Milli-Q water through ultrasonication treatment and was placed in a 20 mL vial. Secondly, benzene - 1, 2, 4, 5-tetracarboxylate (0.0265g), CdSO<sub>4</sub>·4H<sub>2</sub>O (0.0478g), and KB(im)<sub>4</sub> (0.0227g) with a N, N-dimethylformamide (DMF; 4mL) / water (H<sub>2</sub>O; 1mL) / ethanol (CH<sub>3</sub>CH<sub>2</sub>OH; 1mL) solution were added into the vial above, which was heated at 80 °C for 48 hours, and then cooled down to room temperature at a rate of 5°C h<sup>-1</sup>. The Ni foil with attached microcrystalline BIF-89 (**BIF-89-NF-1**) was successively washed with H<sub>2</sub>O and methanol before immersing it in Fe(NO<sub>3</sub>)<sub>3</sub> (10 mM) solution for one hour. Further, the obtained **Fe@BIF-89-NF-1** was washed with water three times before use.

#### 4.2 Synthesis of BIF-89-NF-2

The procedure for fabrication of **BIF-89-NF-2** was the same as that for **BIF-89-NF-1** except for prolonging reaction time to 5 days. **BIF-89-NF-2** was successively washed with H<sub>2</sub>O and methanol before immersing it in Fe(NO<sub>3</sub>)<sub>3</sub> (10 mM) solution for one hour. Further, the obtained **Fe@BIF-89-NF-2** was washed with water three times before use.

#### **4.3 Synthesis of BIF-89@CP**

The procedure for fabrication of **BIF-89@CP** was the same as that for **BIF-89-NF-1** except for using carbon paper instead of the Ni foam.

#### **4.4 Synthesis of Fe@BIF-89@CP**

The procedure for preparation of **Fe@BIF-89@CP** was the same as that for **Fe@BIF-89-NF-1** except for using **BIF-89@CP** instead of **BIF-89-NF-1**.

#### **4.5 BIF-89 coated on glassy carbon electrode (BIF-89@GC)**

The as-synthesized **BIF-89** was ultrasonically dispersed in the mixture of 1 mL of Milli-Q water and ethanol, and then transferred onto the glassy carbon electrode with a loading amount of  $\sim 0.2 \text{ mg cm}^{-2}$ . The resulting electrode was subjected to overnight solvent evaporation in air, subsequent coating with a thin layer of Nafion solution (1.0 wt.% water solution), and drying in air for another 1 h.

#### **4.6 Fe@BIF-89 coated on glassy carbon electrode (Fe@BIF-89@GC)**

The procedure for preparation of **Fe@BIF-89@GC** was the same as that for **BIF-89@GC** except for using **Fe@BIF-89** instead of **BIF-89**.

## Part II: Supplementary Results

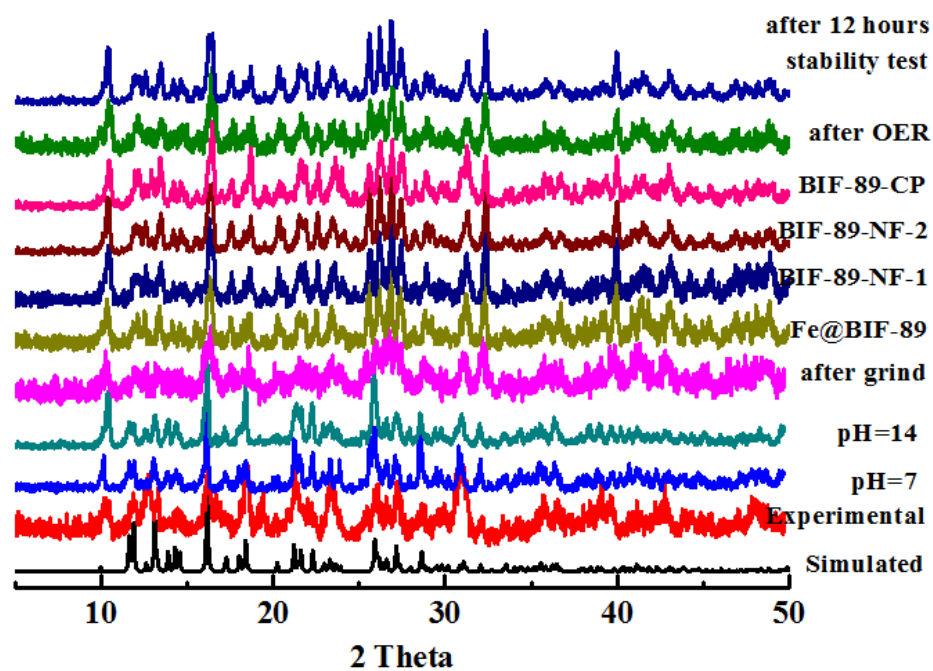

Figure S1. The PXRD patterns of **BIF-89** under different conditions.

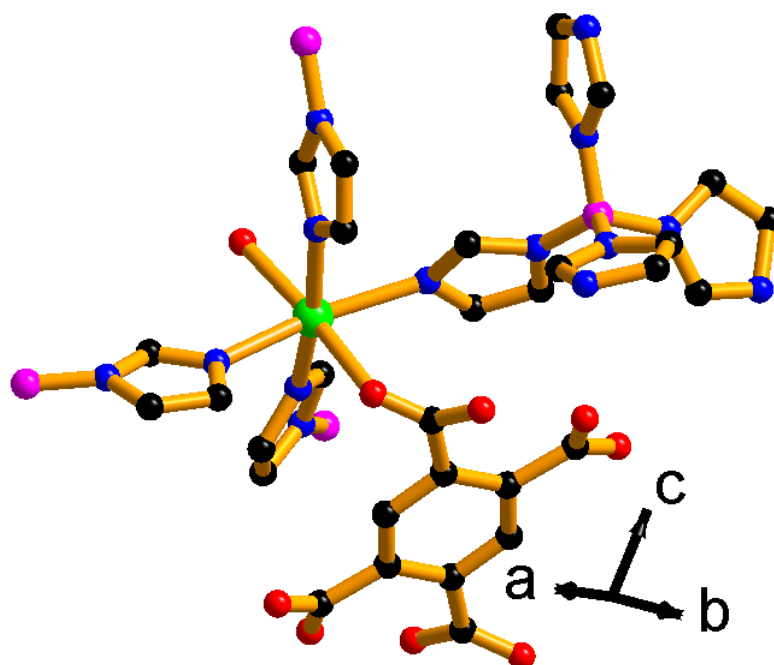

Figure S2. The coordination environment of **BIF-89**.

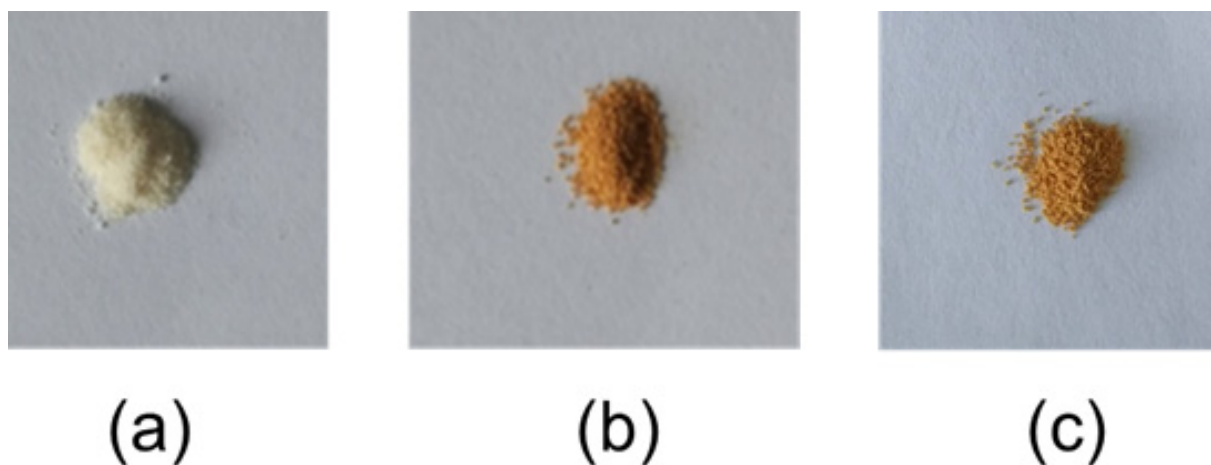

**Figure S3.** (a) Optical image of **BIF-89**; (b) optical image of **Fe@BIF-89**; (c) optical images of **Fe@BIF-89** after immersing in water for 24 hours.

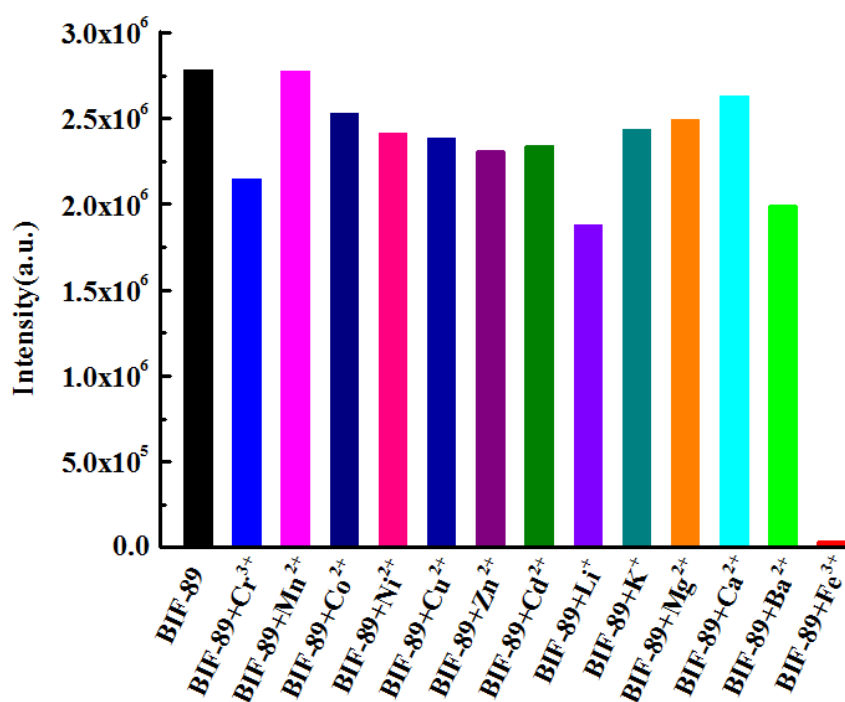

**Figure S4.** Fluorescence response of **BIF-89** in the various metal ion aqueous solutions (10 mM) at 360 nm. The metal salts listed below were used in the luminescent sensing experiments: Fe(NO<sub>3</sub>)<sub>3</sub>, Cr(NO<sub>3</sub>)<sub>3</sub>, Mn(NO<sub>3</sub>)<sub>2</sub>, Co(NO<sub>3</sub>)<sub>2</sub>, Ni(NO<sub>3</sub>)<sub>2</sub>, Cu(NO<sub>3</sub>)<sub>2</sub>, Zn(NO<sub>3</sub>)<sub>2</sub>, Cd(NO<sub>3</sub>)<sub>2</sub>, LiNO<sub>3</sub>, KNO<sub>3</sub>, Mg(NO<sub>3</sub>)<sub>2</sub>, Ca(NO<sub>3</sub>)<sub>2</sub>, Ba(NO<sub>3</sub>)<sub>2</sub>. The dried and fresh sample of **BIF-89** (10.00 mg) in 10 mL of H<sub>2</sub>O was firstly ultrasonicated for one hour to obtain the aqueous colloidal white suspension of **BIF-89**. The sensing experiments were carried out by adding 20 mL of aqueous solutions of different metal ions to 2 mL of **BIF-89** water solution and measuring the photoluminescence spectra.

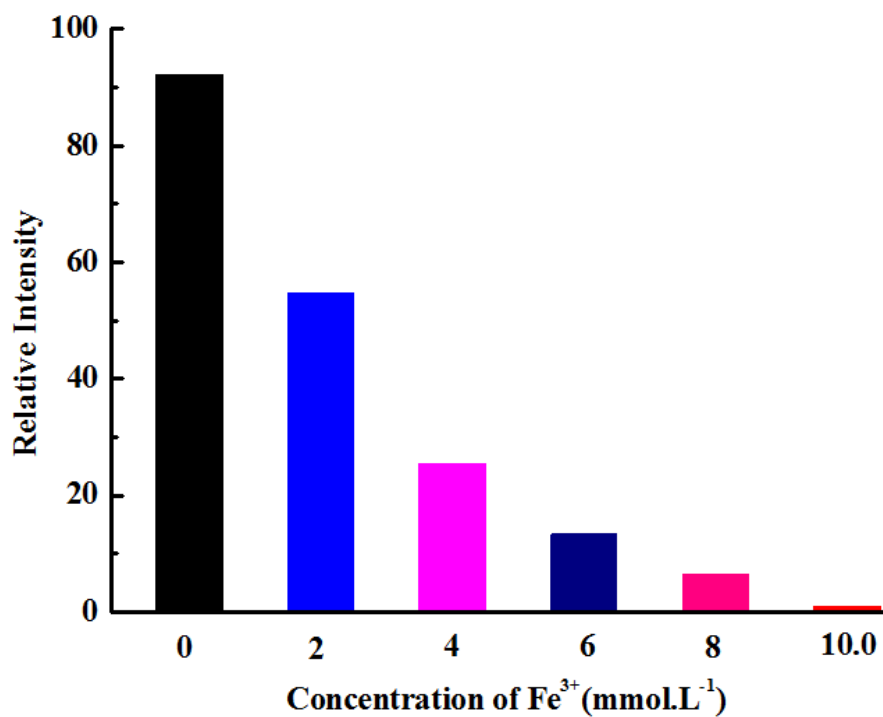

**Figure S5.** Emission spectra of **Fe@BIF-89** at different concentrations of Fe<sup>3+</sup>.

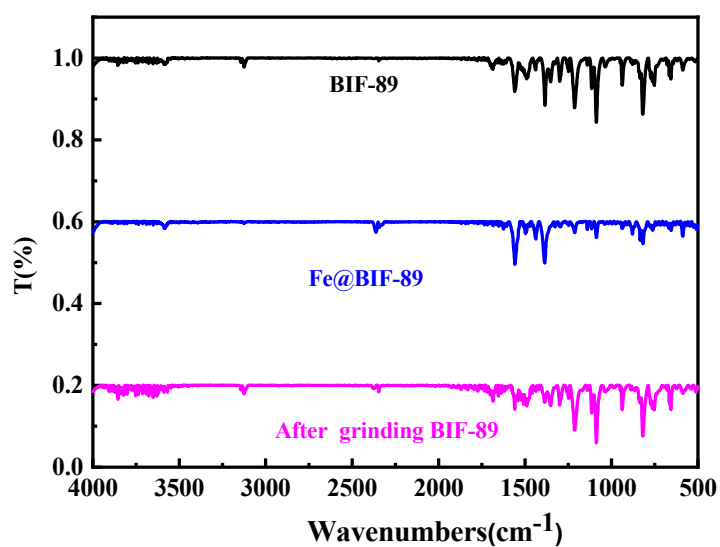

**Figure S6.** Infrared spectra of **BIF-89**, **Fe@BIF-89** and **BIF-89** after grinding.

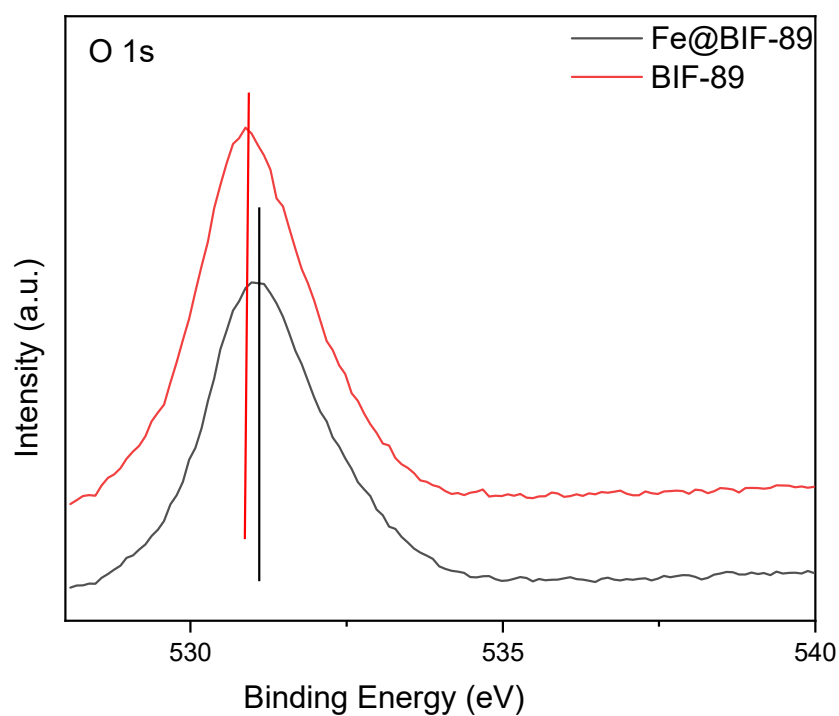

**Figure S7.** O1s XPS spectrum of **BIF-89** and **Fe@BIF-89** samples.

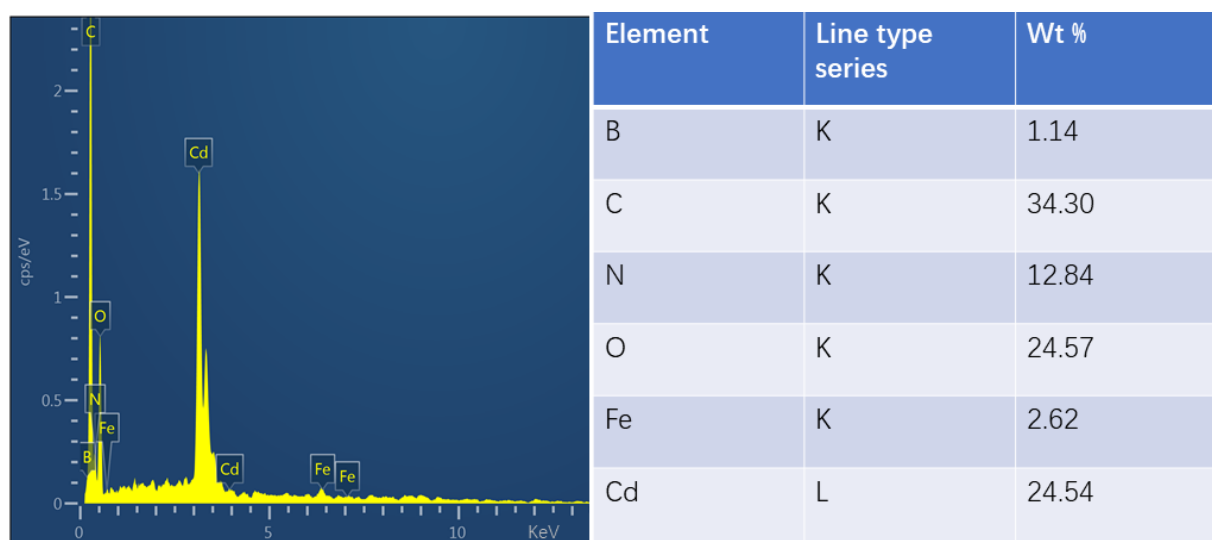

**Figure S8.** EDX analysis of **Fe@ BIF-89**.

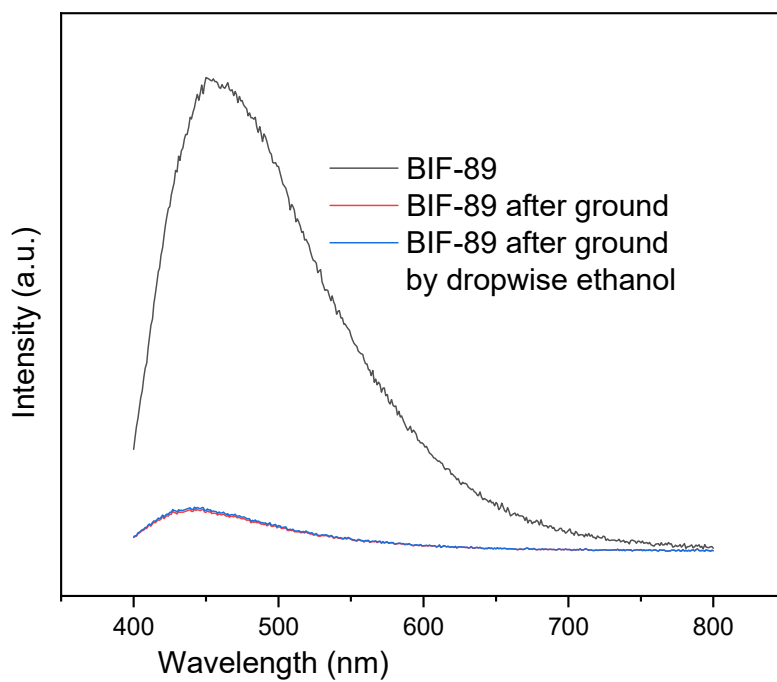

**Figure S9.** The solid-state emission spectra of BIF-89 at different conditions.

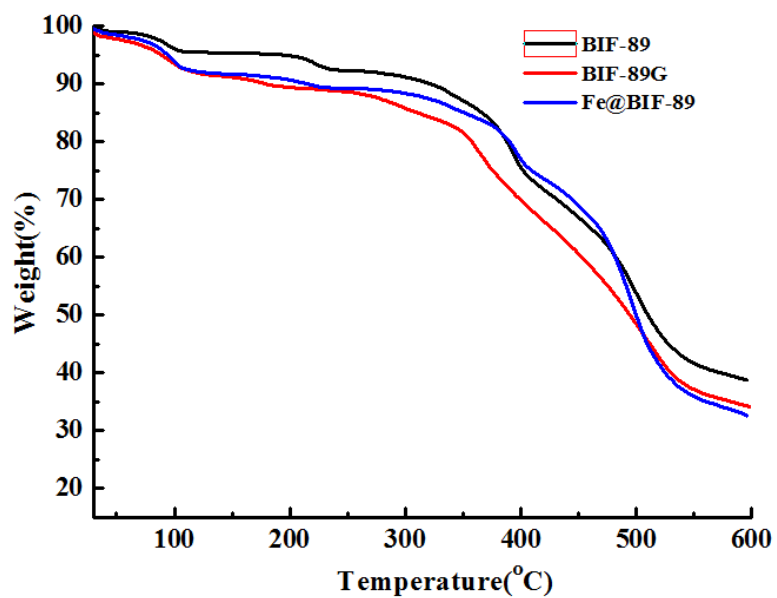

**Figure S10.** Thermogravimetric profiles recorded for **BIF-89**, **BIF-89** after grinding (**BIF-89 G**) and **Fe@BIF-89**.

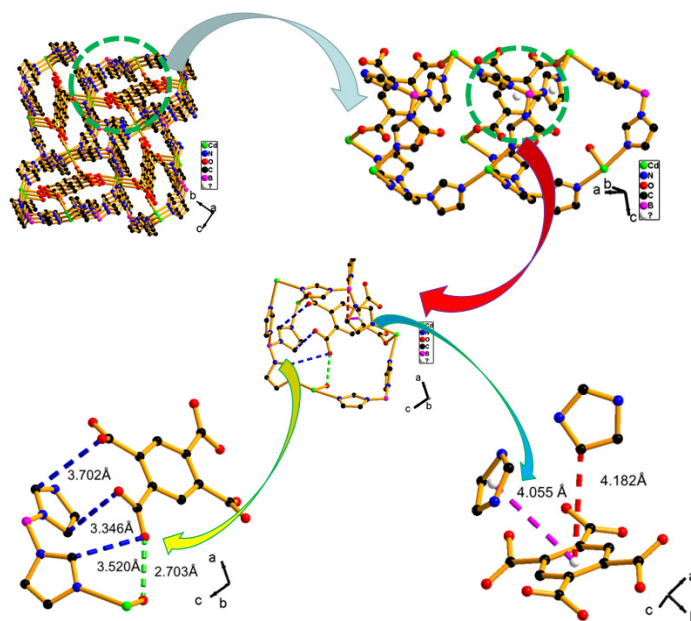

**Figure S11.** Some weak interactions among btcc and imidazolate ligands and the coordinated water molecules.

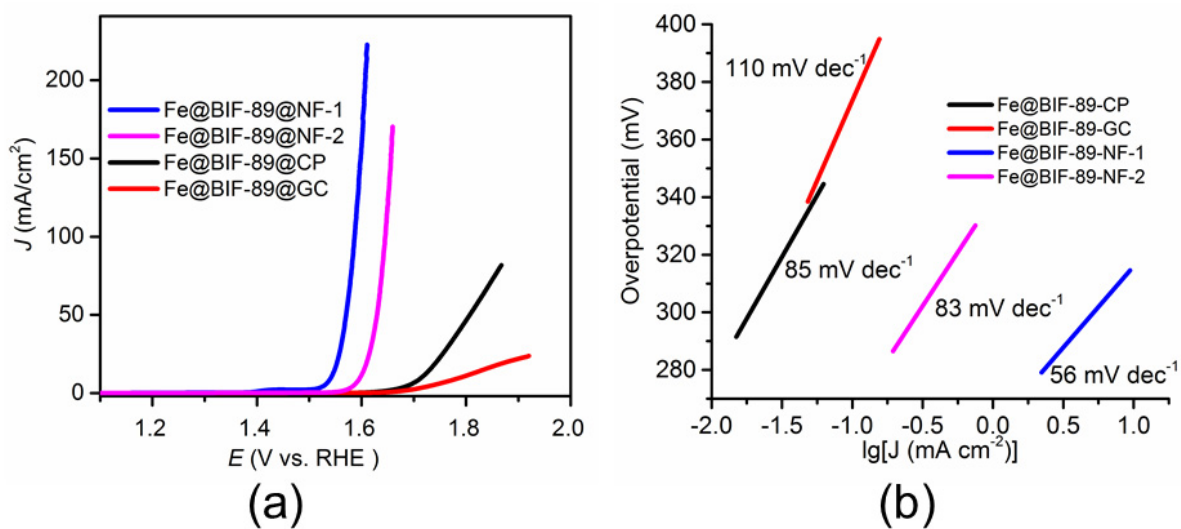

**Figure S12.** LSV and Tafel plots for Fe@BIF-89 on various substrates in 1M KOH aqueous solution.

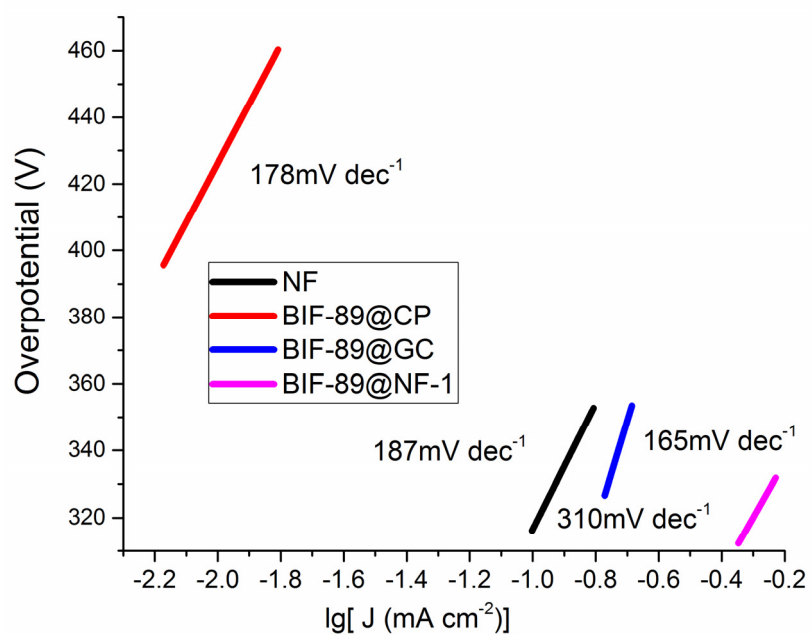

**Figure S13** Tafel plots for **BIF-89** on various substrates and pure Ni foam at pH = 14.

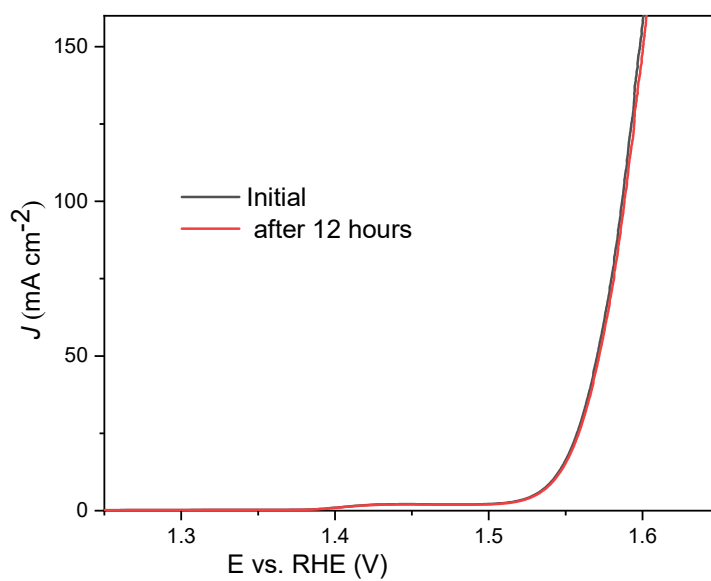

**Figure S14.** LSV curves measured for Fe@BIF-89 before and after stability test.

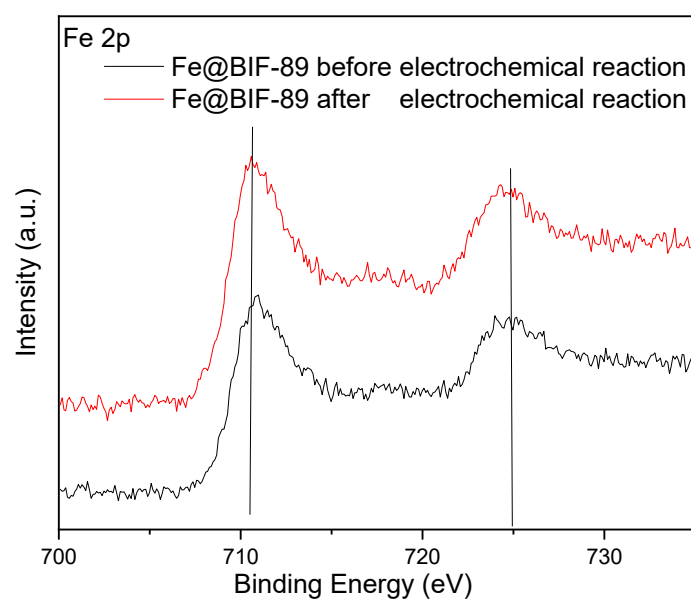

**Figure S15.** Fe2p XPS spectrum of **Fe@BIF-89** before and after electrochemical reaction.

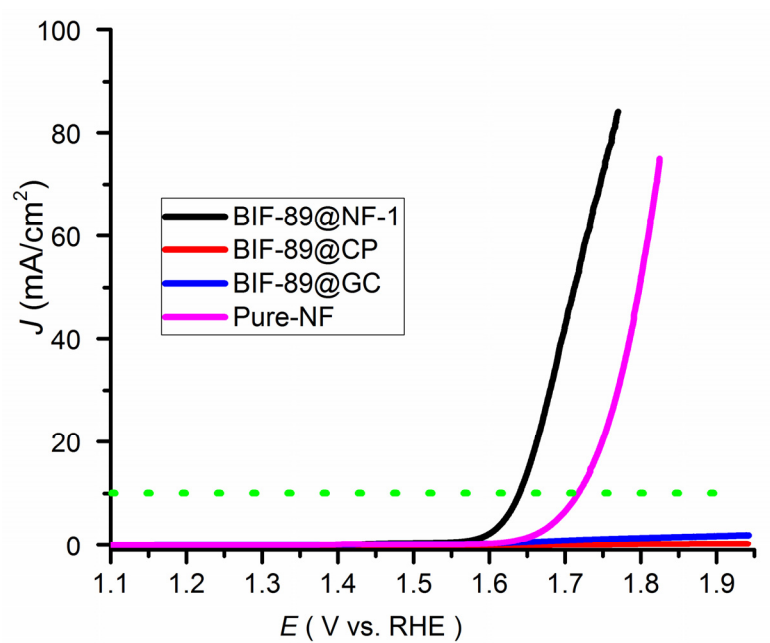

**Figure S16.** LSV curves measured for **BIF-89** on various substrates and pure Ni foam at pH = 14.

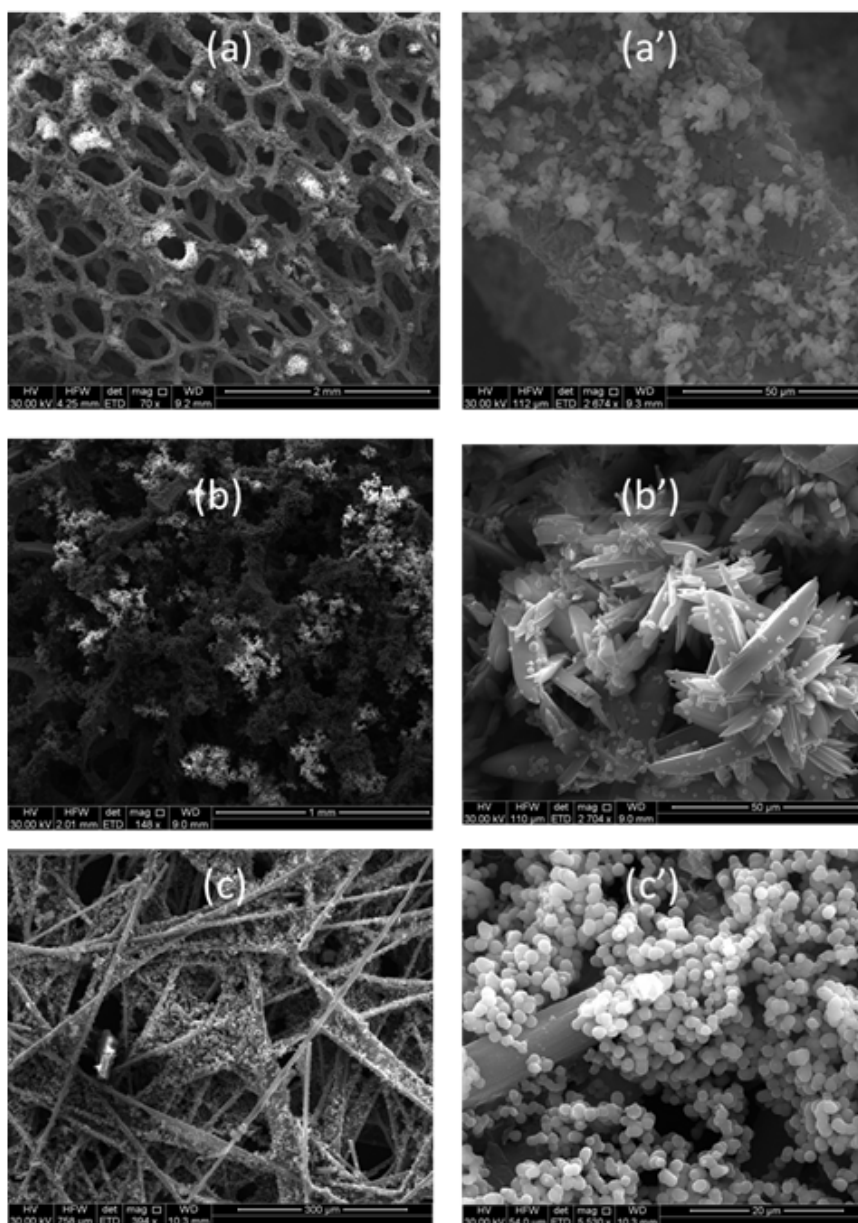

**Figure S17.** SEM images of (a) **BIF-89-NF-1** (mass loading  $0.19 \text{ mg cm}^{-2}$ ), (b) **BIF-89-NF-2** (mass loading  $0.31 \text{ mg cm}^{-2}$ ) and (c) **BIF-89-CP** (mass loading  $0.08 \text{ mg cm}^{-2}$ ). The different morphologies, mass loading and conductive substrate affect the OER performance.

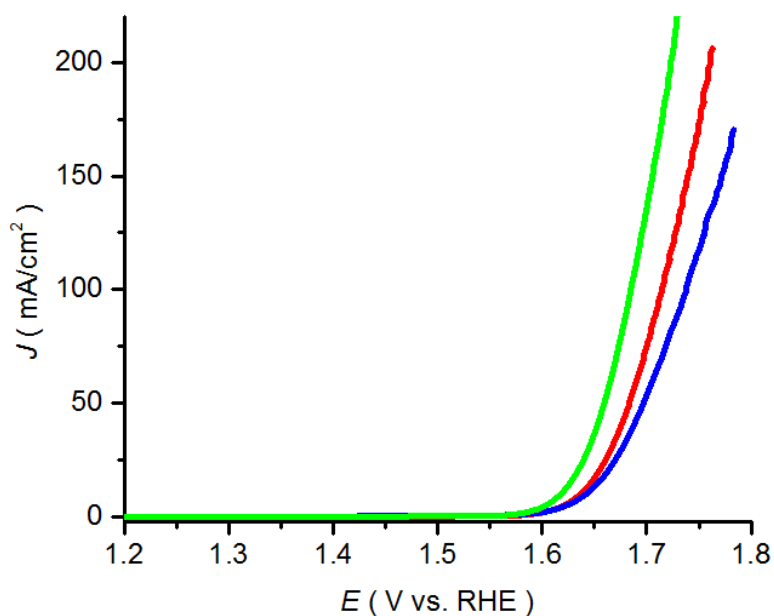

**Figure S18.** LSV curves measured for **Fe@BIF-89-NF-1** at pH = 14. The as-synthesized **BIF-89-NF-1** was washed with H<sub>2</sub>O and methanol before immersing it in Fe(NO<sub>3</sub>)<sub>3</sub> (10 mM) solution for 15 mins, 10 mins, and 1 min. The resulting electrode was subjected to overnight solvent evaporation in air and drying in air for another 4 h (green: 1.8%, red: 1.1%, blue: 0.5%, Fe<sup>3+</sup> uptake was determined by ICP).

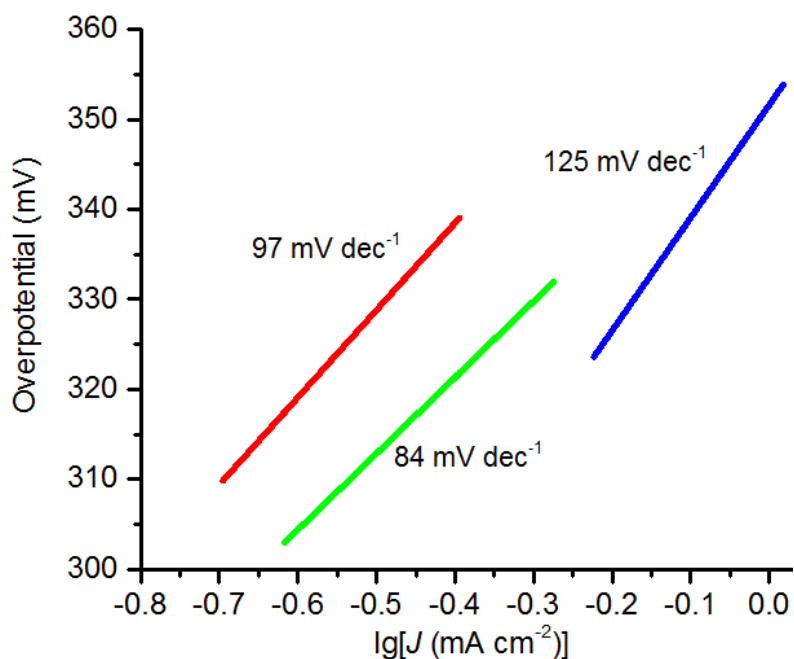

**Figure S19.** Tafel plots for **Fe@BIF-89-NF-1** at pH = 14.

**Table S1.** Summary of Crystallographic Data and Refinement Results

|                                                                    | <b>BIF-89</b>                                                      |
|--------------------------------------------------------------------|--------------------------------------------------------------------|
| chemical formula                                                   | C <sub>17</sub> H <sub>15</sub> B Cd N <sub>8</sub> O <sub>5</sub> |
| formula mass                                                       | 535                                                                |
| Space group                                                        | P 21/c                                                             |
| a/Å                                                                | 9.2198(5)                                                          |
| b/Å                                                                | 14.0236(8)                                                         |
| c/Å                                                                | 15.7941(8)                                                         |
| $\alpha/^\circ$                                                    | 90.00                                                              |
| $\beta/^\circ$                                                     | 105.723(5)                                                         |
| $\gamma/^\circ$                                                    | 90.00                                                              |
| Volume/Å <sup>3</sup>                                              | 1965.69(19)                                                        |
| Z, calculated density(g/cm <sup>3</sup> )                          | 4, 1.806                                                           |
| absorption coefficient (mm <sup>-1</sup> )                         | 1.162                                                              |
| F(000)                                                             | 1064.0                                                             |
| R <sub>int</sub>                                                   | 0.0398                                                             |
| GOF on F <sub>2</sub>                                              | 1.0                                                                |
| R <sub>1</sub> , <sup>a</sup> wR <sub>2</sub> [I > 2 $\delta$ (I)] | R <sub>1</sub> = 0.0314, wR <sub>2</sub> = 0.0652                  |
| R <sub>1</sub> , wR <sub>2</sub> (all data)                        | R <sub>1</sub> = 0.0421, wR <sub>2</sub> = 0.0694                  |
| CCDC Number                                                        | 1584142                                                            |

$$^a R_1 = \Sigma(|F_o| - |F_c|)/\Sigma|F_o|, wR_2 = [\Sigma w(F_o^2 - F_c^2)^2/\Sigma w(F_o^2)^2]^{0.5}$$

**Table S2 Inductively Coupled Plasma Emission-Mass Spectrometry**

| Sample     | Fe (ppb) | Cd(ppb) | Fe content | Cd content |
|------------|----------|---------|------------|------------|
| Fe@ BIF-89 | 59.80    | 2658.59 | 2.3%       | 97.8%      |

**Table S3.** The solid-state photoluminescent lifetimes ( $\tau$ ) of the **BIF-89** sample before and after grinding.

| T (K)       | $\tau_1$ (s) (%)  | $\tau_2$ (s) (%) | $\tau_3$ (s) (%) |
|-------------|-------------------|------------------|------------------|
| 77 K        | 8.284E-10 (38.50) | 5.463E-9 (38.61) | 6.367E-8 (22.90) |
| 298 K       | 2.195E-10 (40.72) | 4.857E-9 (27.14) | 5.873E-8 (32.14) |
| 77 K Ground | 1.057E-10 (59.27) | 1.907E-8 (23.98) | 9.690E-8 (16.75) |
| 29 K Ground | 7.855E-11 (56.97) | 2.461E-8 (27.51) | 1.303E-7 (15.52) |

**Table S4.** Comparison of the OER activities of **Fe@BIF-89-NF -1** with the reported MOF-based electrocatalysts.

| Catalyst                               | Onset potential (V vs. RHE) | Potential at 10 mA cm <sup>-2</sup> (mV vs. RHE) | Tafel Slope (mV dec <sup>-1</sup> ) | Mass loading (mg cm <sup>-2</sup> ) | Substrate | Ref |
|----------------------------------------|-----------------------------|--------------------------------------------------|-------------------------------------|-------------------------------------|-----------|-----|
| MAF-X27-OH pH=14                       | 1.47                        | 292                                              | 88                                  | 1.13                                | Cu Foil   | 1   |
| Fe <sub>3</sub> -Co <sub>2</sub> pH=13 | 1.431                       | 237                                              | 79                                  | 0.2                                 | Cu Foil   | 2   |
| Co-ZIF-9 pH=13                         | NA                          | 510 (1 mA cm <sup>-2</sup> )                     | 193                                 | 0.15                                | FTO glass | 3   |
| Co-WOC-1 pH=13                         | 1.62                        | 390 (1 mA cm <sup>-2</sup> )                     | 128                                 | 0.28                                | GC        | 4   |
| FeTPyP-Co pH=13                        | 1.47                        | 351 (1 mA cm <sup>-2</sup> )                     | NA                                  | NA                                  | Au        | 5   |
| USTA-16 pH=14                          | 1.60                        | 408                                              | 77                                  | 0.35                                | GC        | 6   |
| NiCo-UMOFN pH=14                       | 1.39                        | 189                                              | NA                                  | 0.2                                 | Cu Foil   | 7   |

|                                       |             |                                       |           |             |           |                      |
|---------------------------------------|-------------|---------------------------------------|-----------|-------------|-----------|----------------------|
| Co/MIL-100(Fe)<br>pH=13               | 1.58        | 734<br>(5mA cm <sup>-2</sup> )        | NA        | 0.24        | GC-RDE    | 8                    |
| Ni/Fe-BTC<br>pH=13                    | NA          | 270                                   | 43        | 0.5         | NF        | 9                    |
| Co/MIL-101(Cr)-O<br>pH=13             | 1.53        | 477                                   | 122       | 0.5         | GC-RDE    | 10                   |
| UiO-67-[RuOH <sub>2</sub> ]<br>pH=6.2 | 1.96        | 818<br>(0.15 mA<br>cm <sup>-2</sup> ) | NA        | 0.07        | FTO       | 11                   |
| Fe LDHs                               | NA          | 258                                   | 53        | NA          | NF        | 12                   |
| FeOx                                  | NA          | 431                                   | 93        | NA          | CFC       | 13                   |
| FeOx/CFC-4                            | NA          | 371                                   | 50        | NA          | CFC       | 13                   |
| FeOx/CFC-6                            | NA          | 389                                   | NA        | 0.124       | CFC       | 13                   |
| FeOx/CFC-8                            | NA          | 401                                   | NA        | NA          | CFC       | 13                   |
| NiFe NS                               | NA          | 340                                   | 61        | NA          | NF        | 14                   |
| NiFe NS                               | NA          | 300                                   | 40        | 0.07        | GC        | 15                   |
| b-NiFe LDH                            | NA          | 459                                   | 62        | 0.25        | GC        | 16                   |
| b-NiFe LDH+NGF                        | NA          | 392                                   | 52        | 0.25        | GC        | 16                   |
| n-NiFe LDH/GF                         | NA          | 372                                   | 58        | 0.25        | GC        | 16                   |
| n-NiFe LDH /NGF                       | NA          | 337                                   | 45        | 0.25        | GC        | 16                   |
| m-NiFe/CNx                            | NA          | 360                                   | 59.1      | 0.25        | GC        | 17                   |
| <b>Fe@BIF-89-NF-1<br/>pH=14</b>       | <b>1.49</b> | <b>312</b>                            | <b>56</b> | <b>0.18</b> | <b>NF</b> | <b>This<br/>work</b> |

## References:

- [1] X.-F. Lu, P.-Q. Liao, J.-W. Wang, J.-X. Wu, X.-W. Chen, C.-T. He, J.-P. Zhang, G.-R. Li, X.-M. Chen, *J. Am. Chem. Soc.*, **2016**, *138*, 8336.
- [2] J.-Q. Shen, P.-Q. Liao, D.-D. Zhou, C.-T. He, J.-X. Wu, W.-X. Zhang, J.-P. Zhang, X.-M. Chen, *J. Am. Chem. Soc.*, **2017**, *139*, 1778.
- [3] S. Wang, Y. Hou, S. Lin, X. Wang, *Nanoscale*, **2014**, *6*, 9930.
- [4] P. Manna, J. Debgupta, S. Bose, S. K. Das, *Angew. Chem. Int. Ed.*, **2016**, *55*, 2425.
- [5] B. Wurster, D. Grumelli, D. Hötger, R. Gutzler, K. Kern, *J. Am. Chem. Soc.*, **2016**, *138*, 3623.
- [6] J. Jiang, L. Huang, X. Liu, L. Ai, *ACS Appl. Mater. Inter.*, **2017**, *9*, 7193.
- [7] S.-L. Zhao, Y. Wang, J.-C. Dong, C.-T. He, H.-J. Yin, P.-F. An, K. Zhao, X.-F. Zhang, C. Gao,

- L.-J. Zhang, J.-W. Lv, J.-X. Wang, J.-Q. Zhang, A. M. Khattak, N. A. Khan, Z.-X. Wei, J. Zhang, S.-Q. Liu, H.-J. Zhao, Z.-Y. Tang, *Nat. Energy*, **2016**, 1, 16184.
- [8] H. Wang, F. Yin, G. Li, B. Chen and Z. Wang, *Int. J. Hydrogen Energy*, **2014**, 39, 16179.
- [9] L. Wang, Y.-Z. Wu, R. Cao, L.-T. Ren, M.-X. Chen, X. Feng, J.-W. Zhou, B. Wang, *ACS Appl. Mater. Interfaces*, **2016**, 8, 16736.
- [10] X.-B. He, F.-X. Yin, G.-R. Li, *Int. J. Hydrogen Energy*, **2015**, 40, 9713.
- [11] B. A. Johnson, A. Bhunia, S. Ott, *Dalton Trans.* **2017**, 46, 1382.
- [12] J. Chi, H. M. Yu, B. W. Qin, L. Fu, J. Jia, B. L. Yi, Z. G. Shao, *ACS Appl. Mater. Interfaces*, 2017, 9, 464.
- [13] F. Yan, C. Zhu, S. Wang, Y. Zhao, X. Zhang, C. Li, Y. Chen, *J. Mater. Chem. A*, **2016**, 4, 6048.
- [14] X. Lu, C. Zhao, *Nat. Commun.* **2015**, 6, 6616.
- [15] F. Song, X. Hu, *Nat. Commun.* **2014**, 5, 4477.
- [16] C. Tang, H. Wang, H. Wang, Q. Zhang, G. Tian, J. Nie, F. Wie, *Adv. Mater.* **2015**, 27, 4516.
- [17] S. Q. Ci, S. Mao, Y. Hou, S. M. Cui, H. J. Kim, R. Ren, Z. H. Wen, J. H. Chen. *J. Mater. Chem. A*, **2015**, 3, 7986.
